# Supplementary material
Source: Springer Nature journal article supplement (https://www.springermedizin.de/resource/supplementary/12911_2013_815_MOESM1_ESM.pdf/9526722)
Supplement: MOESM1 [file 9526722]

# Estimating the optimal threshold for a diagnostic biomarker in case of complex biomarker distributions

Fabien Subtil – Muriel Rabilloud

## Additional file 1

### Student-*t* distribution

#### Sampling

The following lines correspond to the WinBUGS code used to sample from the posterior distribution of the parameters of a Student-*t* distribution

```
model
{
  ## N: number of marker measurements
  ## marker: vector marker measurements of length N
  for(i in 1:N)
  {
    marker[i]~dnorm(mu,tau)
  }
  mu~dnorm(0,0.001)
  tau<-pow(exp(logsigma),-2)
  logsigma~dunif(-10,10)
}
```

#### Optimal threshold

The following lines correspond to an R function used to sample from the posterior distribution of the optimal threshold of a marker that follows a Student-*t* distribution in the diseased and in the non-diseased groups.

```
## prevalence: prevalence of the disease in the population
## NBNC: net benefit - net cost ratio

## The following vectors are sample (of length nbsample) from the posterior
distribution of the parameters of the Student-t distribution in the
diseased and non-diseased groups, obtained using for example WinBUGS:
## marker_dis~t(mu_dis,sigma_dis,nu_dis)
## marker_ndis~t(mu_ndis,sigma_ndis,nu_ndis)
## init: initial value for the optimal threshold, used in the Newton
Raphson maximisation

## the function return a sample of length nbsample from the posterior
distribution of the optimal threshold
```

```

f_threshold_distribution=function(prevalence,NBNC,mu_dis,sigma_dis,nu_dis,m
u_ndis,sigma_ndis,nu_ndis,nbsample,init)
{
    R=(1-prevalence)/prevalence/NBNC

    ## utility function by iteration
    f_util=function(x,mu_dis_i,sigma_dis_i,nu_dis_i,mu_ndis_i,sigma_ndis_
i,nu_ndis_i,R)
    {
        return(-((1-pt((x-mu_dis_i)/sigma_dis_i,df=nu_dis_i))+pt((x-
mu_ndis_i)/sigma_ndis_i,df=nu_ndis_i)*R))
    }

    ## maximisation of the utility function, at iteration i
    f_optidis_threshold=function(i)
    {
        mu_dis_i=mu_dis[i]
        sigma_dis_i=sigma_dis[i]
        nu_dis_i=nu_dis[i]
        mu_ndis_i=mu_ndis[i]
        sigma_ndis_i=sigma_ndis[i]
        nu_ndis_i=nu_ndis[i]

        seuil=nlm(f_util,p=init,mu_dis_i=mu_dis_i,sigma_dis_i=sigma_dis_i,nu_
dis_i=nu_dis_i,
mu_ndis_i=mu_ndis_i,sigma_ndis_i=sigma_ndis_i,nu_ndis_i=nu_ndis_i,R=R)$esti
mate
    }

    ## posterior distribution of the optimal threshold
    threshold_distribution=sapply(1:nbsample,f_optidis_threshold)
    return(threshold_distribution)
}

```
